# Supplementary material
Source: Springer Nature journal article supplement (https://www.springermedizin.de/resource/supplementary/12888_2007_464_MOESM1_ESM.pdf/9483334)
Supplement: MOESM1 [file 9483334]

## **PART 2 of the questionnaire**

1. Are you concerned about the appearance of some part(s) of your body, which you consider especially unattractive?
  1.  Not at all concerned
  2.  Somewhat concerned
  3.  Moderately concerned
  4.  Very concerned
  5.  Extremely concerned
  
2. Which aspect/feature (e.g. skin, hair, nose, teeth, body size: thin or fat etc) .You can list more than one. \_\_\_\_\_
  
3. If you are at least somewhat concerned, do these concerns preoccupy you? That is, you think about them a lot and they're hard to stop thinking about?
  1.  Not at all
  2.  Somewhat preoccupied
  3.  Moderately preoccupied
  4.  Very preoccupied
  5.  Extremely preoccupied
  
4. Has your physical "defect" caused you a lot of distress, torment, pain or difficulty? How much?
  1.  No distress
  2.  Mild, and not too disturbing
  3.  Moderate and disturbing, but manageable
  4.  Severe, and very disturbing
  5.  Extreme and disabling
  
5. Has your physical "defect" caused you impairment in your social, occupational or other important areas of functioning? How much?
  1.  No limitation
  2.  Mild interference, but overall performance not impaired
  3.  Moderate, definite interference but still manageable
  4.  Severe, causes substantial impairment
  5.  Extreme, incapacitating
  
6. Has your physical "defect" significantly interfered with your social life? How much?
  1.  Never
  2.  Occasionally
  3.  Moderately often
  4.  Often
  5.  Very often
  
7. Has your physical "defect" significantly interfered with your education or your ability to function in your role? How much?
  1.  Never
  2.  Occasionally
  3.  Moderately often
  4.  Often
  5.  Very often
  
8. Do you ever avoid things because of your physical "defect"? How often?
  1.  Never
  2.  Occasionally
  3.  Moderately often
  4.  Often

5. □ Very often

NOTES

- All the questions are adapted from the original BIDQ without any modifications except question 2. Question 2 was added by us to assess the foci of concern.
- Question 1 and questions 3-8 were the seven questions of the BIDQ which constituted the scoring scale

SCORING

- The score was the mean of the seven items scaled from 1 to 5. Score for a student = (Sum of responses to the seven questions) / 7.
- A score > 3.0 was the cut-off for identifying BDD.
- For example, if responses to the 7 questions were: 3, 4, 3, 3, 4, 5, and 4; the score would be  $(3+4+3+3+4+5+4) / 7 = 3.7$ .
